# Supplementary material
Source: Springer Nature journal article supplement (https://www.springermedizin.de/resource/supplementary/12998_2008_94_MOESM6_ESM.pdf/9623570)

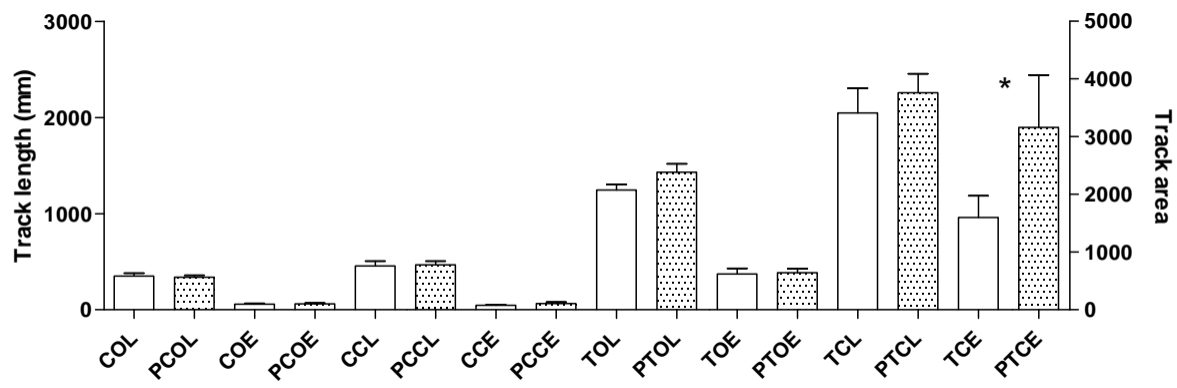

Supplement: MOESM6 [file 9623570]
